# Supplementary material for: Role of progesterone action in inguinal hernia formation via skeletal muscle fibrosis and atrophy
Source: JCI journal article supplement (doi:10.1172/jci.insight.193208), 2025-06-12
Supplement: sd1 [file 1]

## Supplementary Files

### Role of Progesterone Action in Inguinal Hernia Formation via Skeletal Muscle Fibrosis and Atrophy

#### Authors

Tianming You<sup>1</sup>, Mehrdad Zandigohar<sup>2</sup>, Tanvi Potluri<sup>1</sup>, Natalie Piehl<sup>1</sup>, John Coon V<sup>1</sup>, Elizabeth Baker<sup>1</sup>, Maya Kafali<sup>1</sup>, Yang Dai<sup>2</sup>, Jonah J. Stulberg<sup>3</sup>, David J. Escobar<sup>4</sup>, Richard L. Lieber<sup>5-7</sup>, Hong Zhao<sup>1†\*</sup> and Serdar E. Bulun<sup>1†\*</sup>

#### Affiliations

<sup>1</sup>Department of Obstetrics & Gynecology, Feinberg School of Medicine, Northwestern University, Chicago, USA

<sup>2</sup>Department of Biomedical Engineering, University of Illinois Chicago, Chicago, USA

<sup>3</sup>Department of Surgery, McGovern Medical School at the University of Texas Health Sciences Center, Houston, USA

<sup>4</sup>Department of Pathology, Feinberg School of Medicine, Northwestern University, Chicago, USA

<sup>5</sup>Departments of Physical Medicine and Rehabilitation and Biomedical Engineering, Northwestern University, Chicago, USA

<sup>6</sup>Research Service, Hines VA Medical Center, Maywood, IL, USA

<sup>7</sup>Shirley Ryan AbilityLab, Chicago, USA

†These authors jointly supervised this work

*The authors have declared that no conflicts of interest exist.*

#### \*Corresponding Authors

Serdar E. Bulun, M.D.  
Department of Obstetrics & Gynecology  
Feinberg School of Medicine  
Northwestern University, Chicago, 60611, USA  
Phone: +1 312.472.3980  
Email: [s-bulun@northwestern.edu](mailto:s-bulun@northwestern.edu)

Hong Zhao, M.D., Ph.D.  
Department of Obstetrics & Gynecology  
Feinberg School of Medicine  
Northwestern University, Chicago, 60611, USA  
Phone: +1 312.503.0780  
Email: [h-zhao@northwestern.edu](mailto:h-zhao@northwestern.edu)

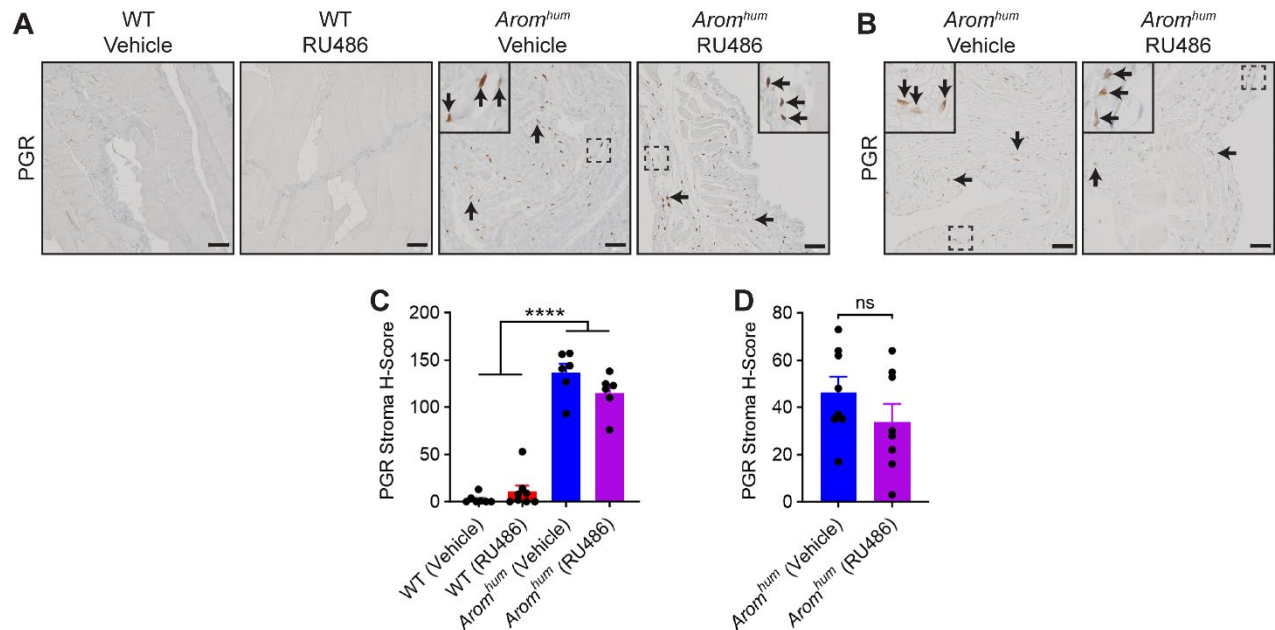

1 **Supplementary Figure S1. Expression of PGR in the LAM of RU486-treated WT and**  
 2 ***Arom<sup>hum</sup>* mice. (A-B)** Representative PGR immunohistochemistry staining images (A) and  
 3 quantification (B) of stromal PGR expression in LAM tissues of WT and *Arom<sup>hum</sup>* mice after 12-  
 4 week RU486 preventive treatment (n = 6-8/group, mean ± S.E.M., two-way ANOVA). (C-D)  
 5 Representative PGR immunohistochemistry staining images (C) and quantification (D) of  
 6 stromal PGR expression in LAM tissues after 12-week RU486 treatment of established hernias  
 7 in *Arom<sup>hum</sup>* mice. (n = 8/group, mean ± S.E.M., t-test). Scale bar, 50 μm. \*\*\*\*p < 0.0001.

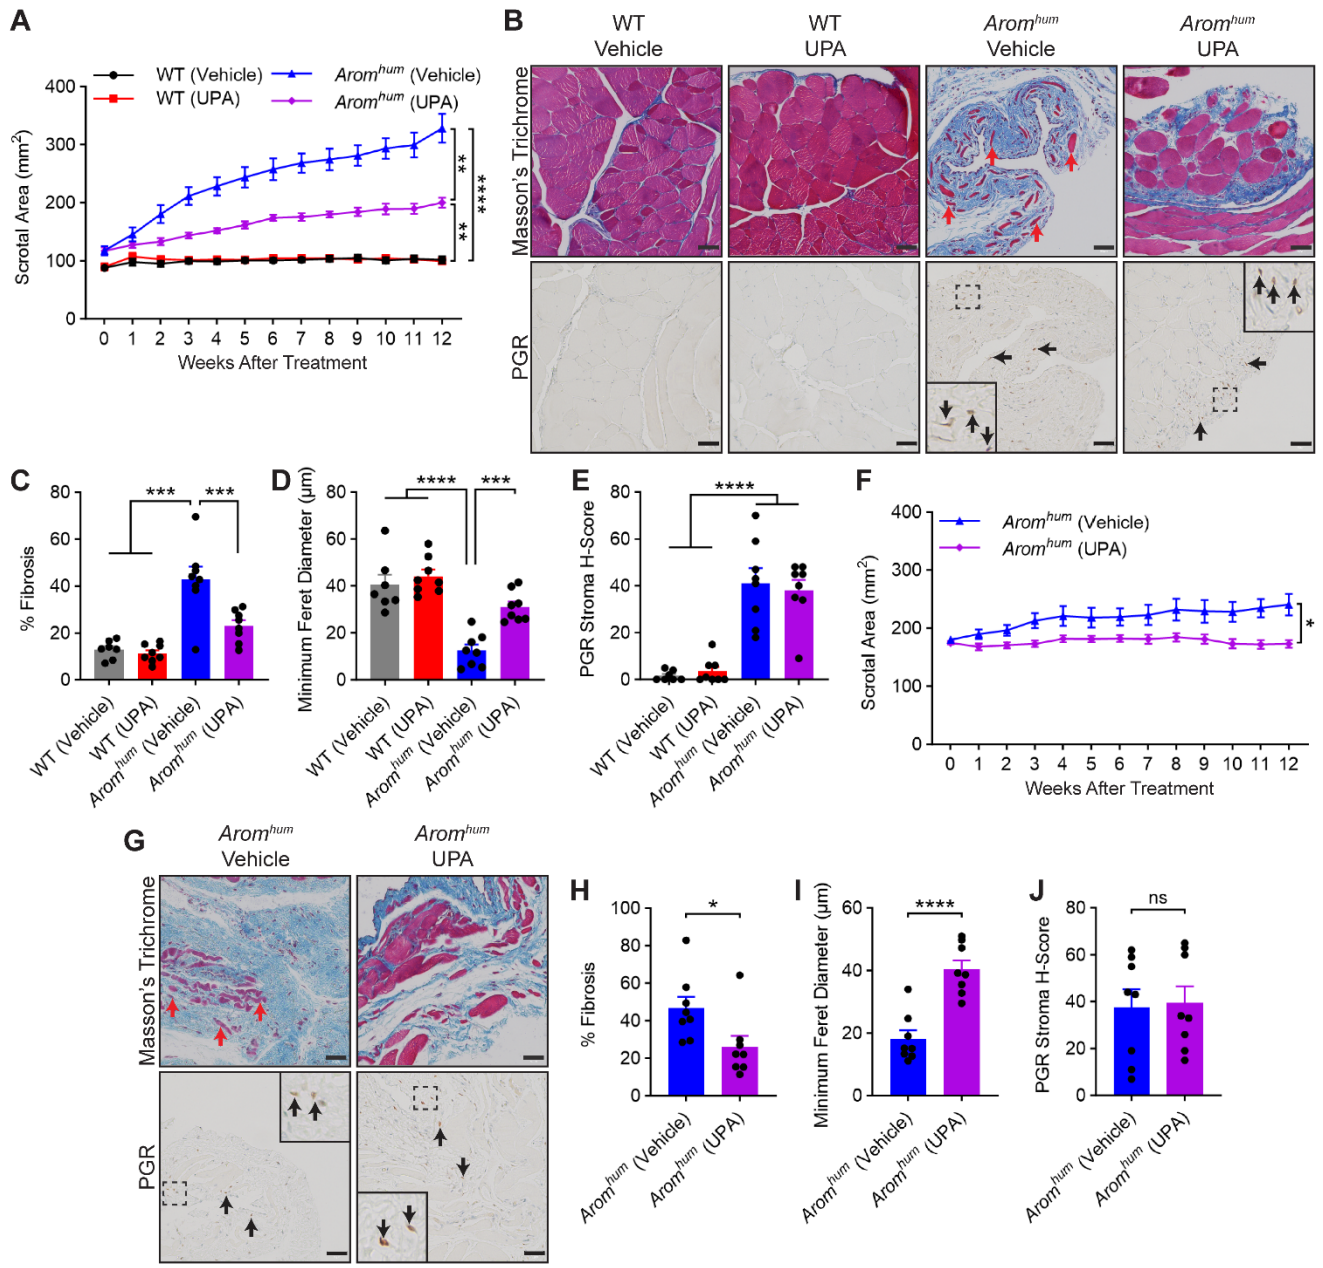

8 **Supplementary Figure S2. Ulipristal acetate (UPA) treatment prevents hernia development**  
 9 **and delays further hernia growth in *Arom*<sup>hum</sup> mice.** (A) Scrotal/hernia area measurements of  
 10 WT and *Arom*<sup>hum</sup> mice treated with UPA for hernia prevention (n = 10-11/group, mean ± S.E.M.,  
 11 repeated measures ANOVA). (B) Representative images of LAM Masson's trichrome staining and  
 12 immunohistochemistry staining for PGR in WT and *Arom*<sup>hum</sup> mice after 12-week UPA  
 13 preventive treatment. Red arrows show atrophying myofibers in herniated LAM tissue in  
 14 vehicle-treated *Arom*<sup>hum</sup> mice. (C-E) Quantification of (C) fibrotic area, (D) minimum Feret  
 15 diameter, and (E) stromal PGR expression in LAM tissues after 12-week UPA preventive  
 16 treatment (n = 7-8/group, mean ± S.E.M., two-way ANOVA). (F) Scrotal/hernia area  
 17 measurements of *Arom*<sup>hum</sup> mice with established hernias treated with UPA (n = 11-12/group,  
 18 mean ± S.E.M., multiple t-test). (G) Representative images of LAM Masson's trichrome staining

19 and immunohistochemistry staining for PGR after 12 weeks of UPA treatment of established  
20 hernias in *Arom<sup>hum</sup>* mice. Red arrows show atrophying myofibers in herniated LAM tissue in  
21 vehicle-treated *Arom<sup>hum</sup>* mice. **(H-J)** Quantification of **(H)** fibrotic area, **(I)** minimum Feret  
22 diameter, and **(J)** stromal PGR expression in LAM tissues after 12 weeks of UPA treatment of  
23 established hernias in *Arom<sup>hum</sup>* mice (n = 8/group, mean ± S.E.M., t-test). Scale bar, 50 μm. \*p <  
24 0.05, \*\*p < 0.01, \*\*\*p < 0.001, \*\*\*\*p < 0.0001.  
25

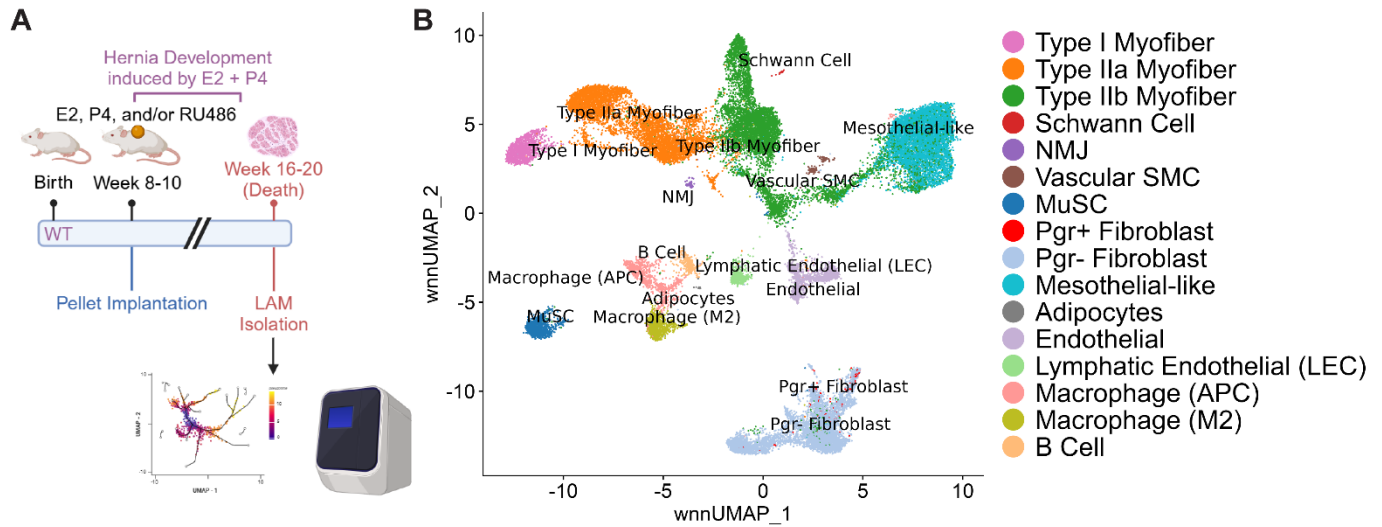

26 **Supplementary Figure S3. Combined cell type composition from LAM tissue of WT mice**  
 27 **treated with E2, P4, and/or RU486. (A)** Schematic for the treatment of WT mice  
 28 **and/or RU486 for LAM single-nuclei isolation. (B)** UMAP plot of all Vehicle (Veh), E2 + P4  
 29 **(EP), and E2 + P4 + RU486 (EPR) LAM nuclei combined after weighted nearest neighbor (wnn)**  
 30 **integration, separated by cell type. A total of 16 distinct cell types were identified and grouped**  
 31 **based on canonical marker expression.**

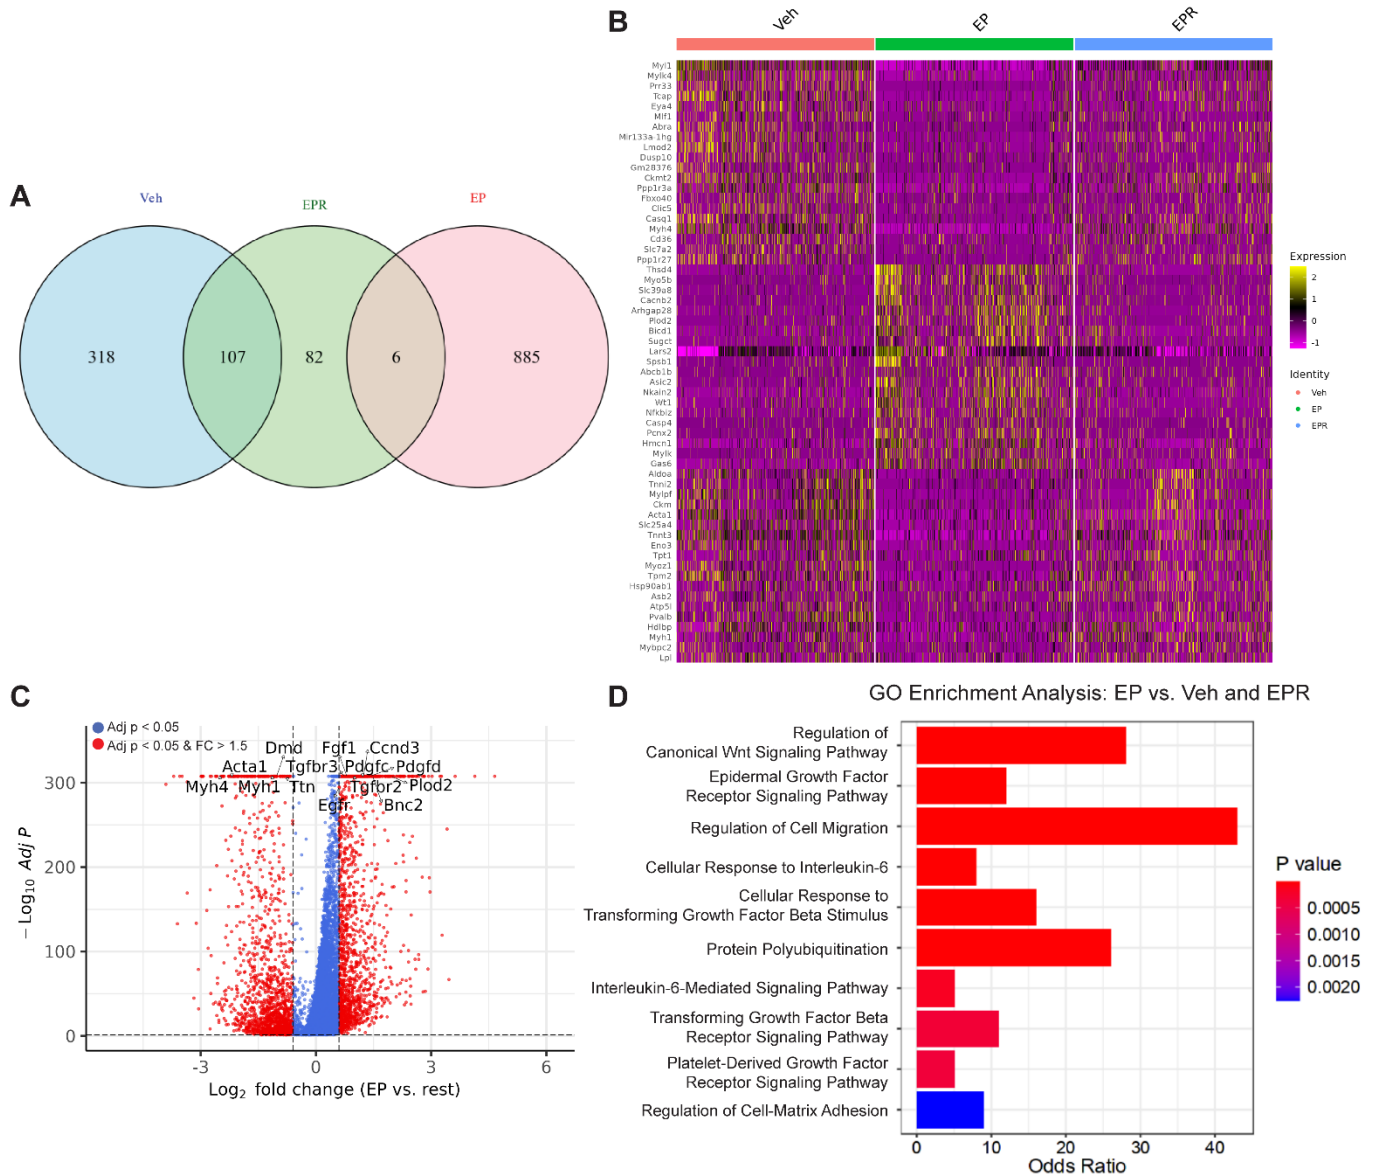

32 **Supplementary Figure S4. Increased inflammatory and fibrotic signaling in bulk**  
 33 **transcriptomics of LAM tissue from WT mice treated with E2, P4, and/or RU486. (A)** Venn  
 34 diagram showing overlap of upregulated genes in the entire LAM of WT mice treated with  
 35 vehicle (Veh), E2 + P4 (EP), and E2 + P4 + RU486 (EPR) (fold change > 1.5, Wilcoxon rank-  
 36 sum test,  $p < 0.05$ ). **(B)** Heatmap of top 20 upregulated genes in entire Veh, EP, and EPR LAM.  
 37 **(C)** Volcano plot showing upregulated and downregulated genes in the entire EP LAM relative to  
 38 both the entire Veh LAM and EPR LAM (fold change > 1.5, Wilcoxon rank-sum test,  $p < 0.05$ ).  
 39 **(D)** Gene Ontology (GO) processes enriched in the entire EP LAM, represented by odds ratio.

40  
41

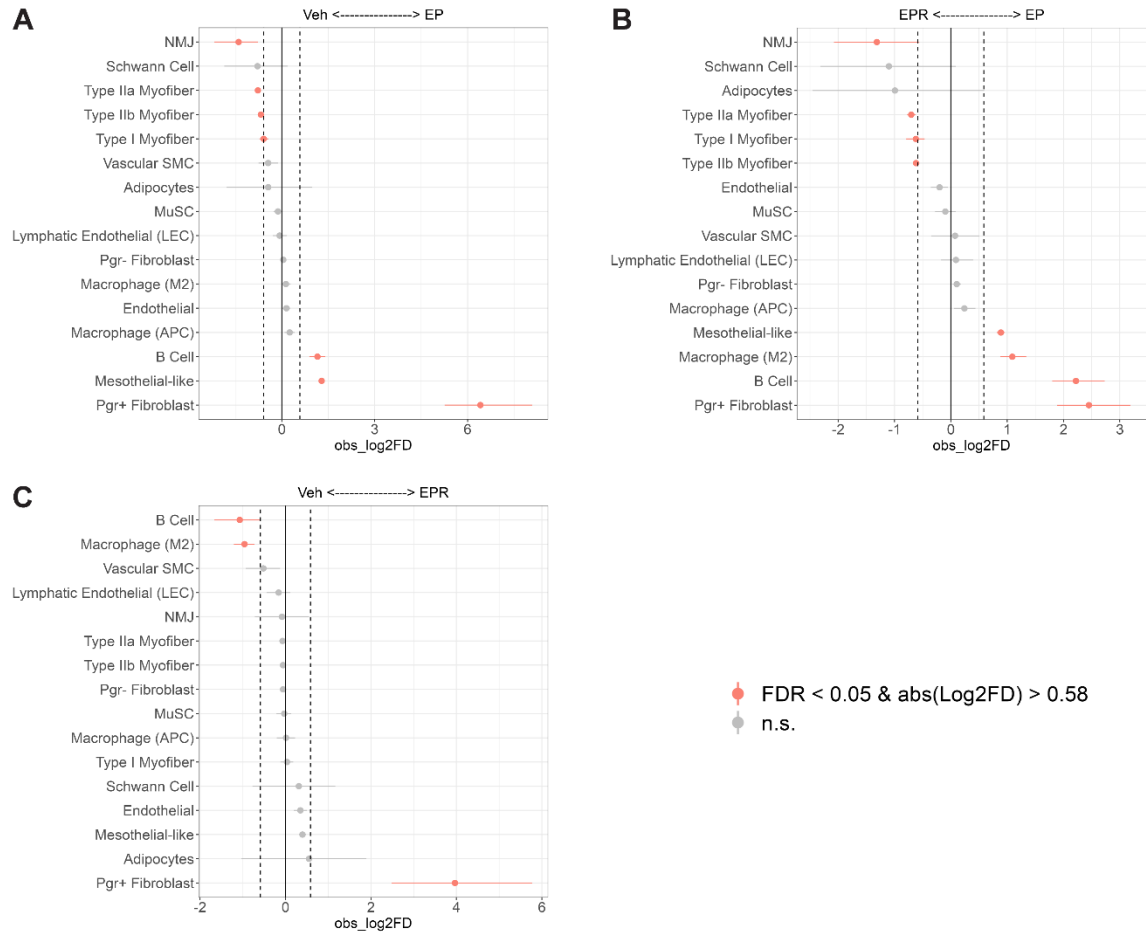

42 **Supplementary Figure S5. Differences in cell type proportion between Vehicle (Veh), E2 +**  
 43 **P4 (EP), and E2 + P4 + RU486 (EPR) LAM. (A-C) Forest plot depicting the difference in each**  
 44 **cell type's proportion in (A) EP vs. Veh, (B) EP vs. EPR, and (C) EPR vs. Veh LAM. A red dot**  
 45 **indicates a statistically significant difference in proportion of that cell type between the two**  
 46 **treatment groups. Horizontal lines indicate the range of the 95% confidence interval (fold change**  
 47 **> 1.5, permutation test with FDR correction,  $p < 0.05$ ).**  
 48

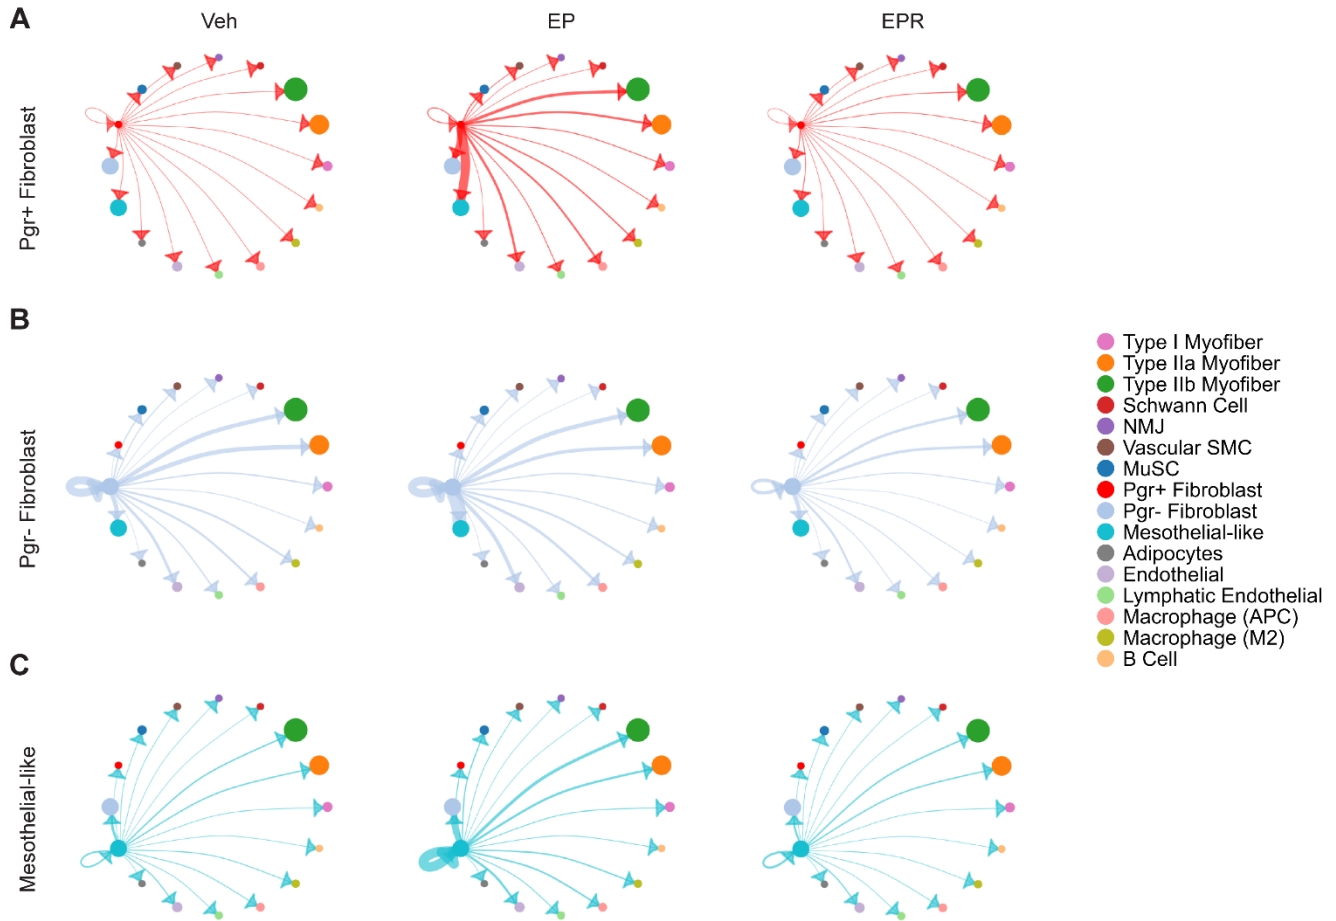

49 **Supplementary Figure S6. Outgoing communication networks from *Pgr*<sup>+</sup> fibroblasts, *Pgr*<sup>-</sup>**  
50 **fibroblasts, and mesothelial-like cells to other LAM cell types. (A-C) Visualization of cell-**  
51 **cell communication using CellChat, comparing communication networks between Vehicle (Veh),**  
52 **E2 + P4 (EP), and E2 + P4 + RU486 (EPR) LAM. Circle plots with (A) *Pgr*<sup>+</sup> fibroblasts, (B)**  
53 ***Pgr*<sup>-</sup> fibroblasts, and (C) mesothelial-like cells as the central outgoing nodes. Interactions**  
54 **between pairs of cell types are depicted by a line connecting the two cell types, with line**  
55 **thickness indicating the strength of the interaction.**  
56

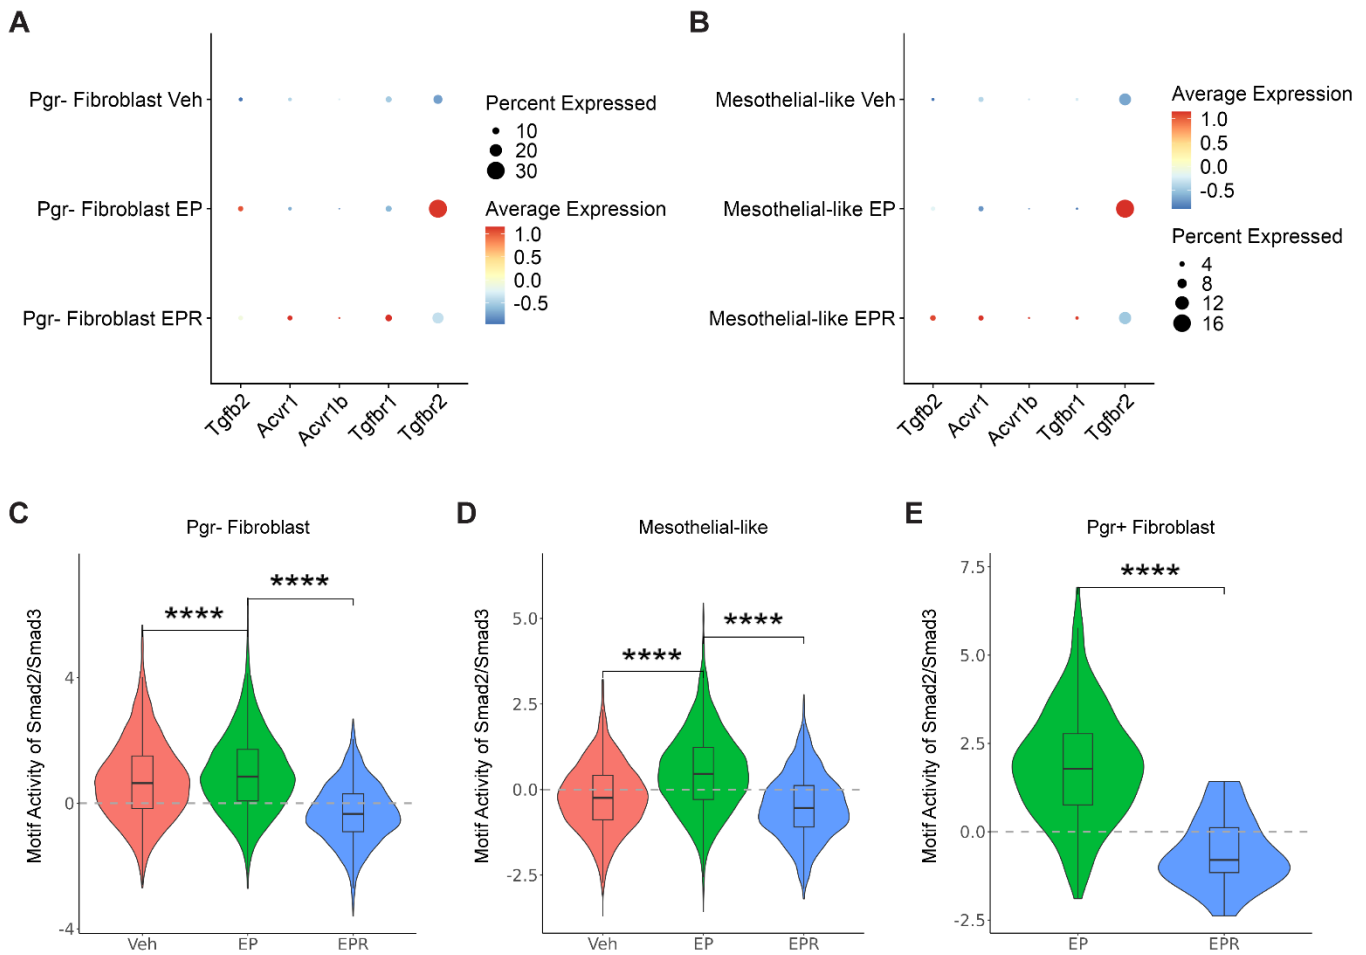

57 **Supplementary Figure S7. Expression of TGFβ pathway ligands and receptors in *Pgr***  
 58 **fibroblasts and mesothelial-like cells. (A-B)** Comparison of *Tgfb2*, *Acvr1*, *Acvr1b*, *Tgfb1*, and  
 59 *Tgfb2* expression in Vehicle (Veh), E2 + P4 (EP), and E2 + P4 + RU486 (EPR) LAM for (A)  
 60 *Pgr*<sup>-</sup> fibroblasts and (B) mesothelial-like cells. Size of dots corresponds to frequency of  
 61 expression within a treatment group. Color of dots corresponds to average expression level  
 62 within the treatment group. (C-D) Comparison of inferred motif activity of Smad2/Smad3  
 63 (downstream transcription factors in the TGFβ pathway) in Veh, EP, and EPR LAM for (C) *Pgr*<sup>-</sup>  
 64 fibroblasts and (D) mesothelial-like cells. (E) Inferred motif activity of Smad2/Smad3 in *Pgr*<sup>+</sup>  
 65 fibroblasts. Wilcoxon rank-sum test, \*\*\*\*p < 0.0001.

66  
67

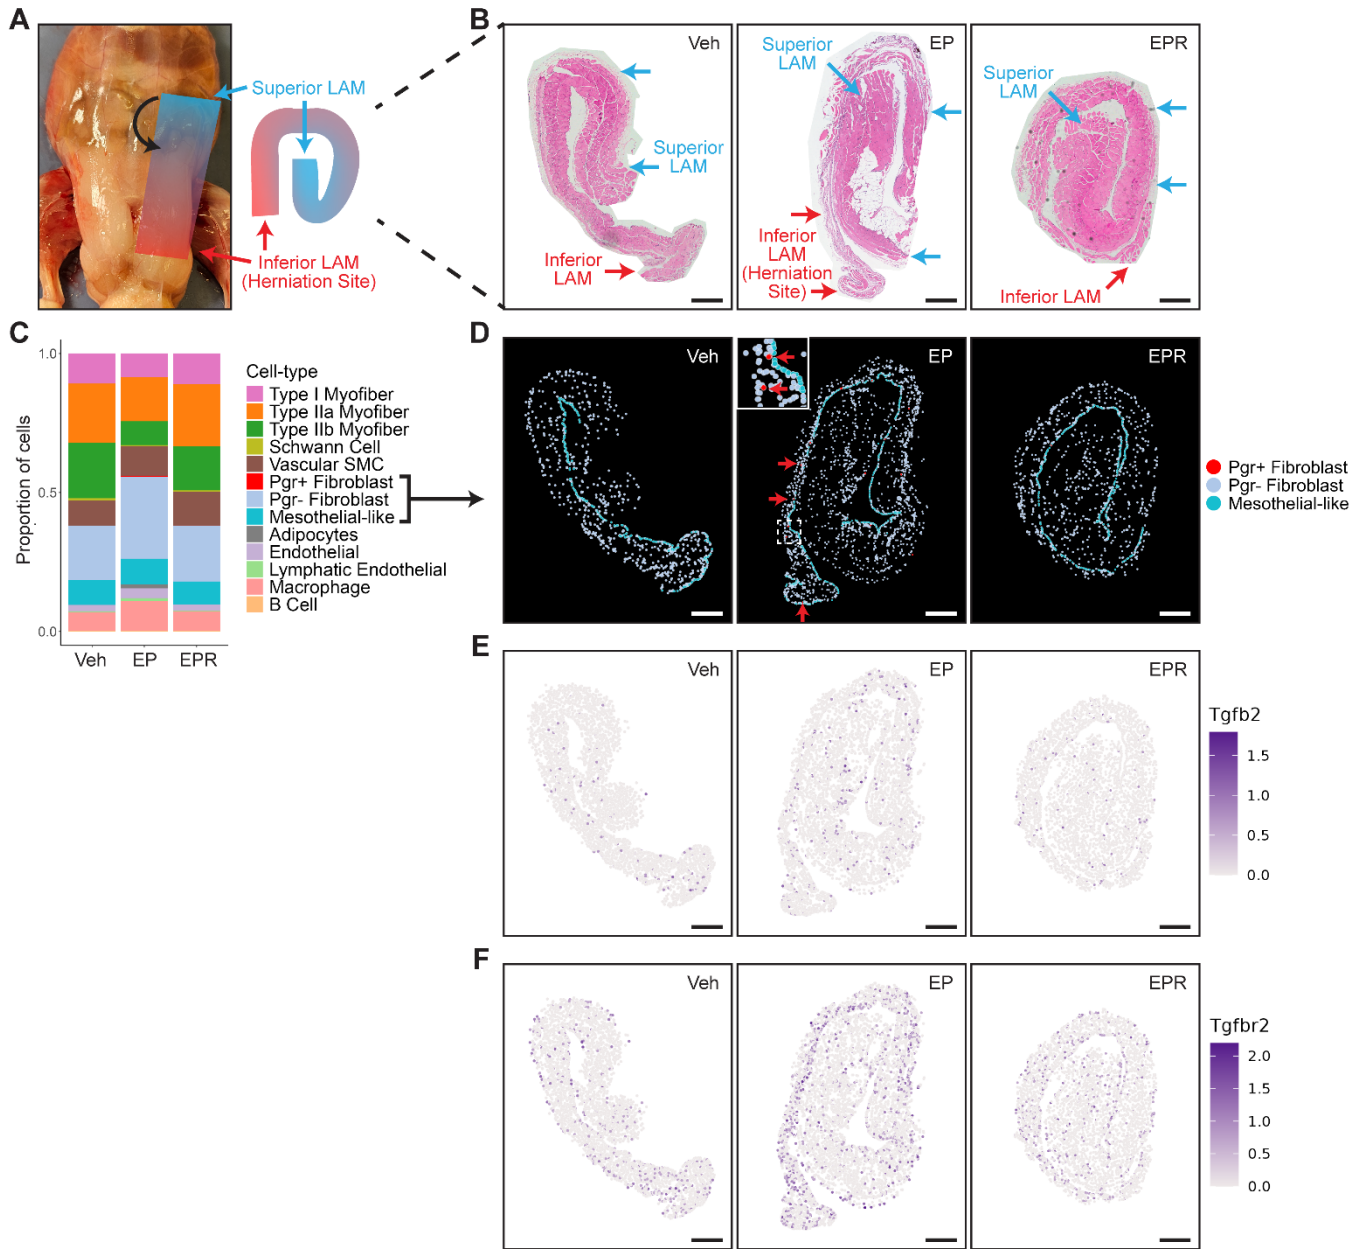

68 **Supplementary Figure S8. Expression and spatial distribution of *Tgfb2* and *Tgfr2* in the**  
 69 **LAM of mice with E2/P4-induced hernias. (A)** Schematic depicting the isolation, rolling up,  
 70 and final orientation of LAM tissue for Xenium spatial transcriptomics. **(B)** Hematoxylin and  
 71 eosin staining of LAM tissue from WT mice treated with vehicle (Veh), E2 + P4 (EP), and E2 +  
 72 P4 + RU486 (EPR). Superior (cyan arrows) and inferior (red arrows) portions of LAM are  
 73 highlighted. **(C)** Cell-type compositional makeup and **(D)** spatial distribution of *Pgr*<sup>+</sup> fibroblasts,  
 74 *Pgr*<sup>-</sup> fibroblasts, and mesothelial-like cells in Veh, EP, and EPR LAM. *Pgr*<sup>+</sup> fibroblasts in EP  
 75 LAM are highlighted (red arrows). **(E-F)** Spatially resolved gene expression of **(E)** *Tgfb2* and  
 76 **(F)** *Tgfr2* in Veh, EP, and EPR LAM. Scale bar, 500  $\mu$ m.

77

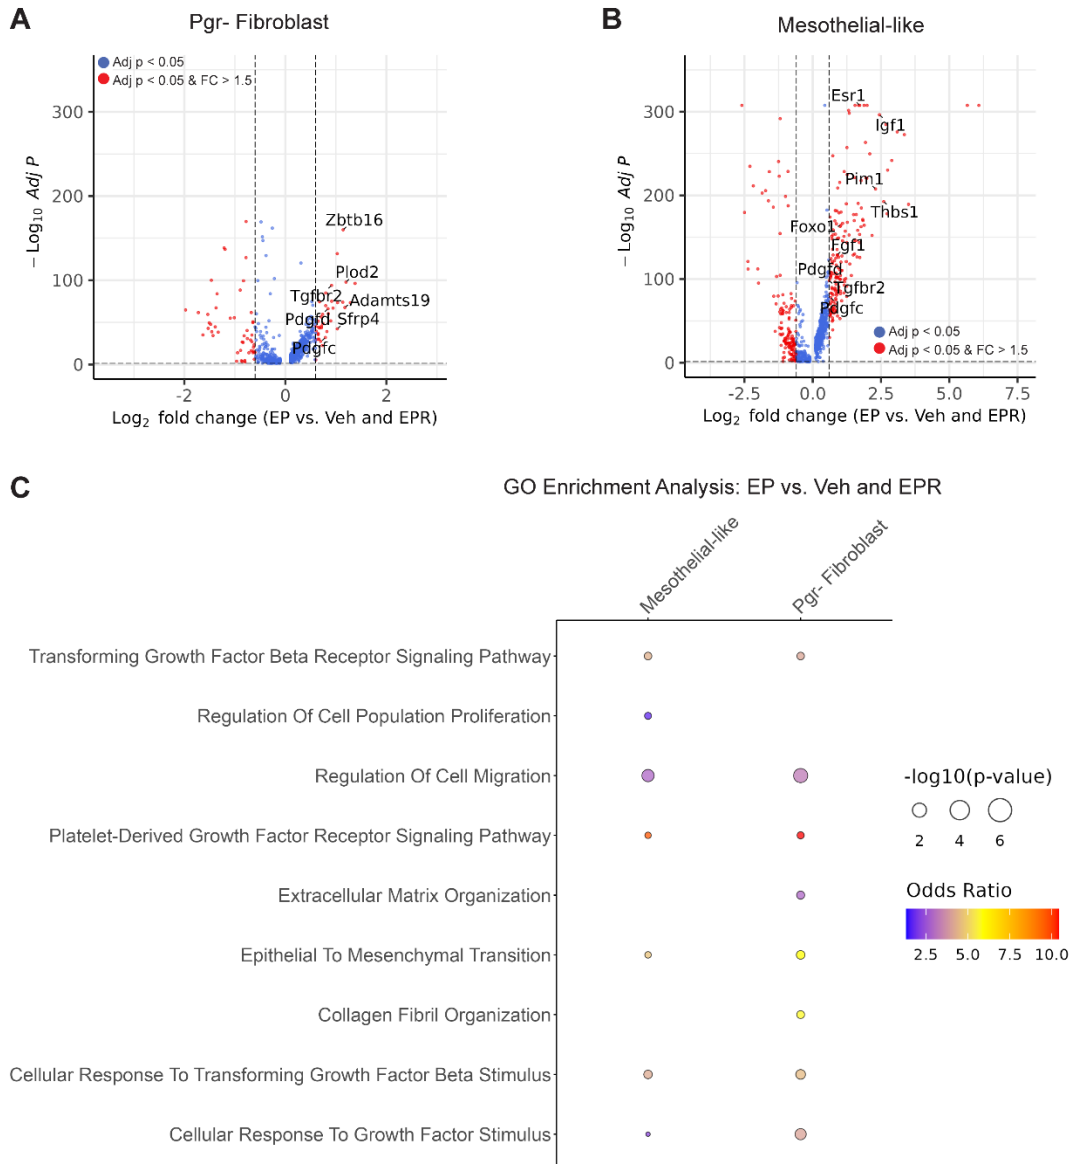

78 **Supplementary Figure S9. DEG analysis of *Pgr* fibroblasts and mesothelial-like cells from**  
 79 **LAM of mice with E2/P4-induced hernias. (A-B) Volcano plots showing upregulated and**  
 80 **downregulated genes in (A) *Pgr* fibroblasts and (B) mesothelial-like cells from E2 + P4 (EP)**  
 81 **LAM compared to Vehicle (Veh) and E2 + P4 + RU486 (EPR) LAM (fold change > 1.5,**  
 82 **Wilcoxon rank-sum test,  $p < 0.05$ ). (C) Dot plot showing Gene Ontology (GO) processes**  
 83 **enriched in EP LAM *Pgr* fibroblasts and mesothelial-like cells, represented by odds ratio.  $n = 3-$**   
 84 **4/group.**  
 85

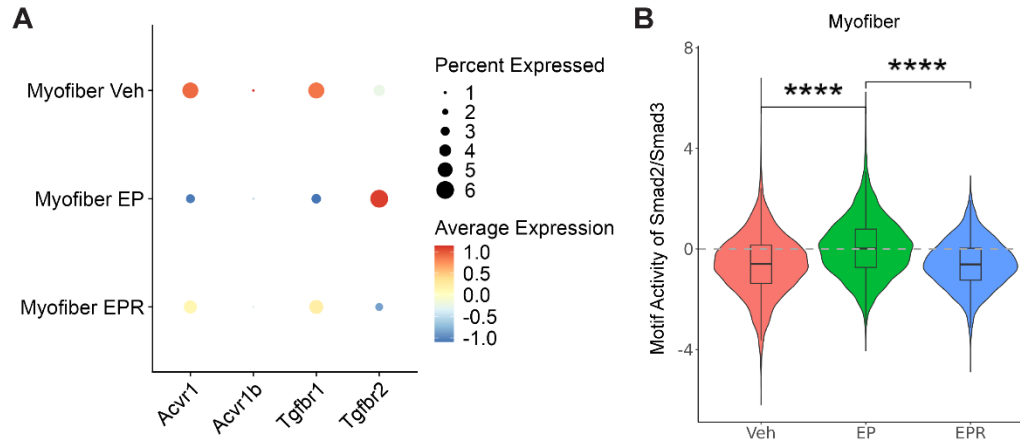

86 **Supplementary Figure S10. Expression of TGFβ pathway receptors in myofibers. (A)**  
 87 Relative expression of *Acvr1*, *Acvr1b*, *Tgfbr1*, and *Tgfbr2* for all myofiber types in Vehicle  
 88 (Veh), E2 + P4 (EP), and E2 + P4 + RU486 (EPR) LAM. Size of dots corresponds to frequency  
 89 of expression within a treatment group. Color of dots corresponds to average expression level  
 90 within the treatment group. **(B)** Comparison of inferred motif activity of Smad2/Smad3  
 91 (downstream transcription factors in the TGFβ pathway) for all myofiber types in Veh, EP, and  
 92 EPR LAM. Wilcoxon rank-sum test, \*\*\*\*p < 0.0001.  
 93

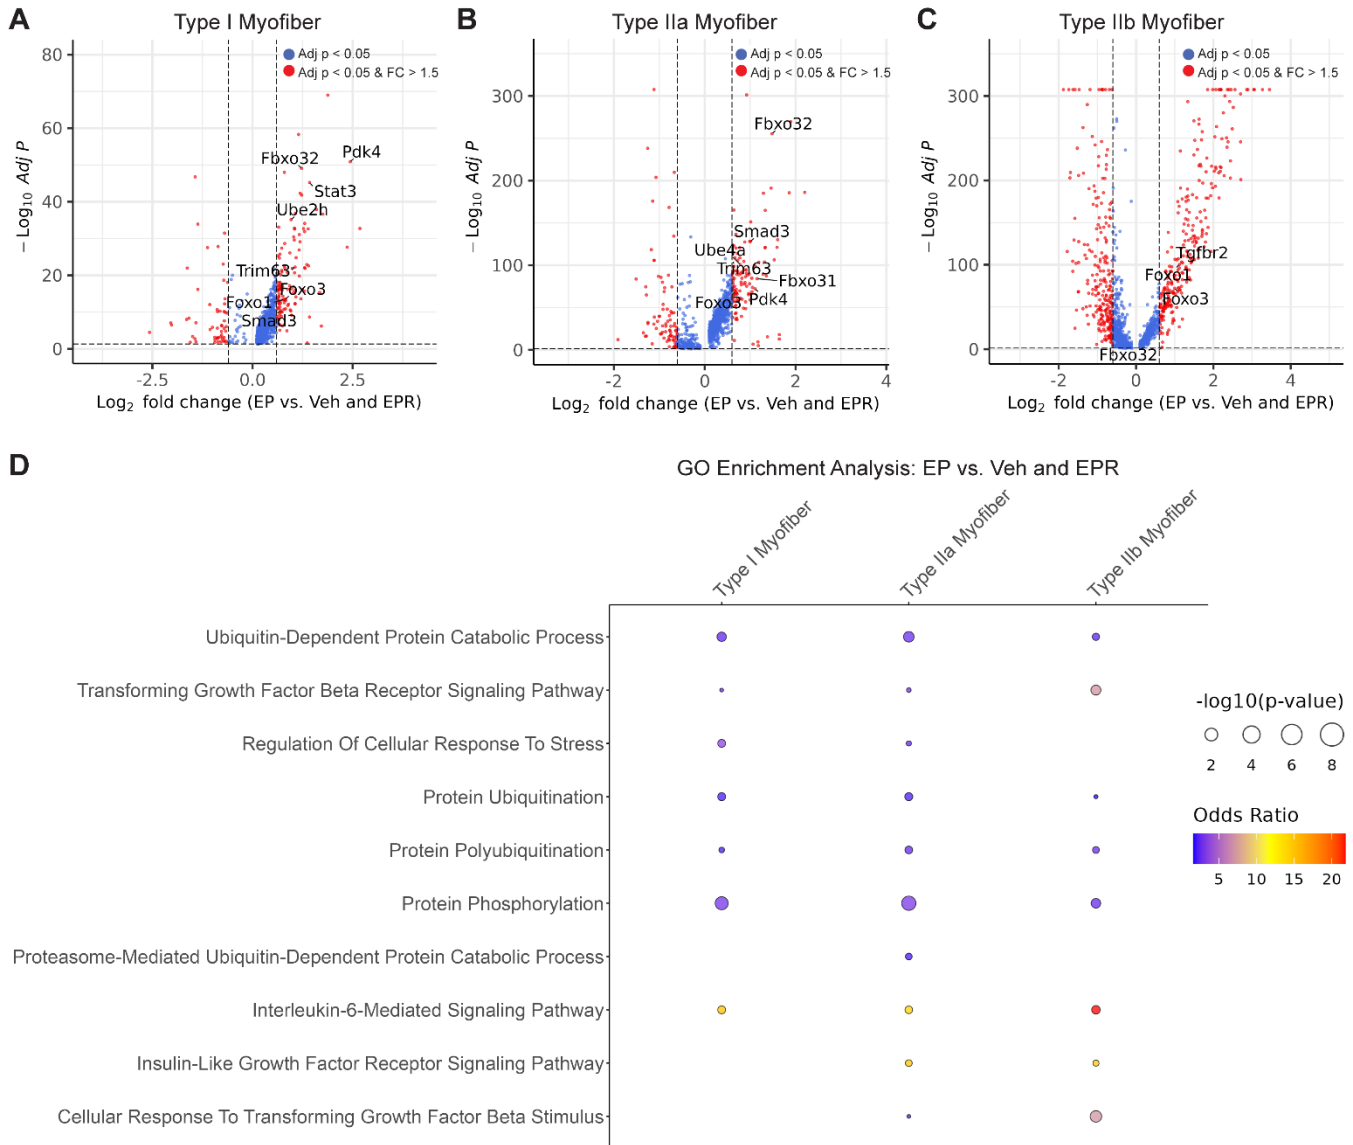

94 **Supplementary Figure S11. DEG analysis of myofibers from LAM of mice with E2/P4-**  
 95 **induced hernias. (A-C)** Volcano plots showing upregulated and downregulated genes of (A)  
 96 type I, (B) type IIa, and (C) type IIb myofibers in E2 + P4 (EP) LAM compared to Vehicle (Veh)  
 97 and E2 + P4 + RU486 (EPR) LAM (fold change > 1.5, Wilcoxon rank-sum test, p < 0.05). (D)  
 98 Dot plot showing Gene Ontology (GO) processes enriched in EP LAM type I, type IIa, and type  
 99 IIb myofibers, represented by odds ratio. n = 3-4/group.

## 100 **Materials and Methods**

### 101 Fibroblast Cell Culture

102 *Fibroblast Isolation:* Fibroblasts were isolated as previously described (1). Briefly, mouse LAM  
103 tissues were harvested and placed in wash media (Hyclone Ham's F-10 nutrient mixture with  
104 1mM L-glutamate [GE Life Sciences], 10% horse serum [Life Technologies], and penicillin-  
105 streptomycin [Gibco]) on ice. LAM tissues were minced into a slurry and incubated in muscle  
106 dissociation buffer (wash media with 1000U/mL collagenase II [Worthington Biochemical]) at  
107 37°C with 70 rpm agitation for 1.5 hours. The cells were then washed and resuspended in  
108 fibroblast growth media (Ham's F-12 media with 10% FBS [Gibco], penicillin-streptomycin  
109 [Gibco], and plasmocin prophylactic [InvivoGen]) and grown on 0.15% gelatin-coated tissue  
110 culture plates. After waiting 1 hour to allow for LAM fibroblasts to adhere to the plate, the  
111 supernatant containing other cell types was removed. Cells were grown to 90% confluence  
112 before passaging.

113

114 *Fibroblast Treatments:* After one passage, primary fibroblasts were grown to ~60-70%  
115 confluency, then starved overnight (16 hours) in phenol-red free, serum-free media (Ham's F-12  
116 without phenol-red with penicillin-streptomycin [Gibco] and plasmocin prophylactic  
117 [InvivoGen]). E2 antagonists (Fulvestrant, 100 nM in DMSO) and P4 antagonists (RU486, 1  $\mu$ M  
118 in ethanol; UPA, 1  $\mu$ M in ethanol; ZK299, 1  $\mu$ M in ethanol) were added 2 hours before E2 (10  
119 nM in ethanol) and R5020 (a synthetic version of P4, 100 nM in ethanol) for all experiments.  
120 During treatment, 0.1% charcoal-stripped FBS (Gibco) was added to ensure cell survival during  
121 longer incubation times (24-48 hours).

122

123 *Immunoblot*: Primary fibroblasts were cultured, starved, and treated as outlined in *Fibroblast*  
124 *Treatments*. To extract protein, fibroblasts were incubated for 1.5 hours at 4°C in Pierce™ IP  
125 Lysis Buffer (Thermo Fisher Scientific, #87787) with 1:100 Halt™ Protease Inhibitor Cocktail  
126 (Thermo Fisher Scientific, #78430). Protein concentrations in the lysate were measured via BCA  
127 Assay (Thermo Fisher Scientific, #A55864). Protein samples were prepared with LDS Buffer  
128 containing 10% BME, separated via SDS-PAGE, and subsequently transferred to polyvinylidene  
129 difluoride membranes (Thermo Fisher Scientific). Membranes were blocked in 5% nonfat milk  
130 dissolved in Tris-buffered saline containing 0.1% Tween-20 (Sigma-Aldrich, #9005-64-5,  
131 TBST), incubated overnight at 4°C with primary antibody, washed with TBST, and incubated  
132 with horseradish peroxidase (HRP)-conjugated secondary antibody at room temperature.  
133 Immunoreactivity was detected with Immobilon Crescendo Western HRP substrate (Millipore,  
134 #WBLUR0100). Primary antibodies used included: mouse anti-PGR monoclonal antibody  
135 (Invitrogen, #MA5-12658; discontinued), rabbit anti-PGR polyclonal antibody (Abclonal,  
136 #A0321), and HRP-conjugated mouse anti-β-actin monoclonal antibody (Proteintech, #60008).  
137 Secondary antibodies used included: HRP-conjugated goat anti-rabbit IgG (Cell Signaling,  
138 #7074) and HRP-conjugated horse anti-mouse IgG (Cell Signaling, #7076).

139

140 *EdU Assay*: The contents and concentrations of all culture media, hormones, and drugs used  
141 were the same as in *Fibroblast Treatments*. Primary fibroblasts were transferred to 96-well plate  
142 and seeded at a density of 10,000 cells per well. Fibroblasts were given time to attach (~24  
143 hours), then starved overnight (16 hours) before being treated with E2, R5020, RU486, UPA,  
144 and/or ZK299 in starvation media with 0.1% charcoal-stripped FBS added. After incubation for  
145 24 hours, the EdU Assay was performed using the Click-iT™ EdU Proliferation Assay for

146 Microplates (Invitrogen, #C10499). Fibroblasts were incubated with 10 $\mu$ M EdU for 3.5 hours  
147 before fixation and click labeling with Amplex™ UltraRed for 15 minutes. Sample wells were  
148 read on a microplate reader using an excitation wavelength of 568nm and an emission  
149 wavelength of 585nm.

150

151 *siRNA Knockdown Treatments:* The contents and concentrations of all culture media, hormones,  
152 and drugs used were the same as in *Fibroblast Treatments*. Fibroblasts were given time to attach  
153 (~24 hours), then starved overnight (16 hours) before being treated with E2, R5020, and/or  
154 siRNA in starvation media with 0.1% charcoal-stripped FBS added. siRNA treatment involved  
155 addition of 75nM *Pgr* siRNA (Dharmacon, L-057577-01-0005) or 75nM non-targeting siRNA  
156 (Dharmacon, D-001810-10-05) and 1:200 DharmaFECT 1 transfection reagent (Dharmacon, T-  
157 2001-02).

158

## 159 **References**

160 1. Judson RN, Low M, Eisner C, and Rossi FM. Isolation, Culture, and Differentiation of  
161 Fibro/Adipogenic Progenitors (FAPs) from Skeletal Muscle. *Methods Mol Biol.* 2017;1668:93-  
162 103.

163
